# Supplementary material for: A shell-like Sm-doped CeO2 nanostructure based electrochemical DNA biosensor for breast cancer gene sequence detection
Source: Royal Society of Chemistry journal article supplement (doi:10.1039/c4ay01935k), 2014-01-01
Supplement: c4ay01935k1.pdf [file c4ay01935k1.pdf]

**Supplementary data for the manuscript entitled “A shell-like Sm-doped CeO<sub>2</sub> nanostructure based electrochemical DNA biosensor for breast cancer gene sequence detection”**

**Results and discussions**

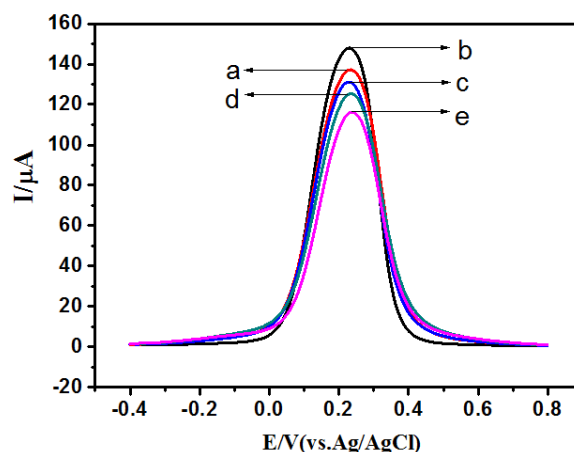

**Fig. 1. The DPV curves of modified ITO electrodes with various Sm content. (a) un-doped, (b) 5%, (c) 10%, (d) 15%, (e) 20%.**

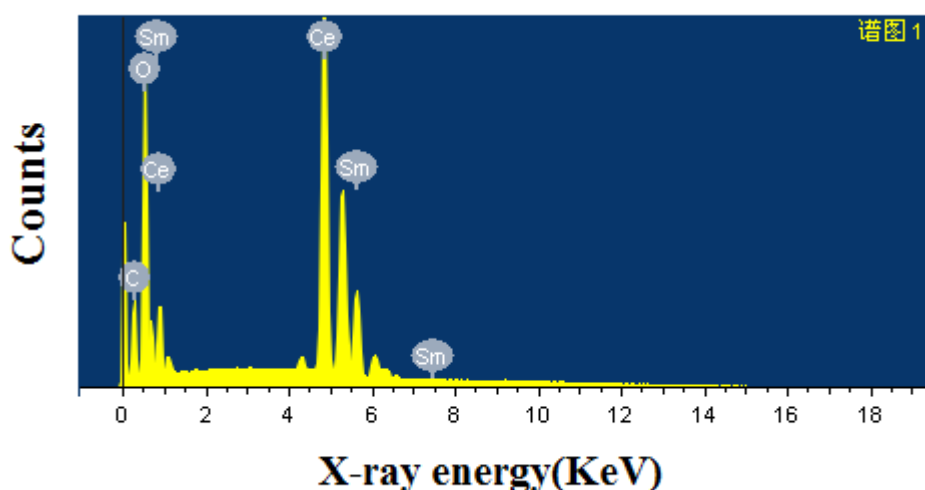

**Fig. 2. EDS spectra of 5% doped samarium doped cerium dioxide( CSO)**

**Table 1. Elemental composition of 5% doped CSO**

| Element | Weight percentage/% | Atomic percentage/% |
|---------|---------------------|---------------------|
| C K     | 10.35               | 31.45               |
| O K     | 22.39               | 51.09               |
| Ce L    | 63.83               | 16.63               |
| Sm L    | 3.43                | 0.83                |
| gross   | 100.00              | 100.00              |
